# Supplementary material
Source: publisher figshare collection journal article supplement (https://karger.figshare.com/ndownloader/files/21666516)
Supplement: Supplementary file 1 [file 21666516]

|  | Late ND | No late ND | Odds ratio (95% CI) | *P* value |
| --- | --- | --- | --- | --- |
|  | n=57 | n=819 |  |  |
| Age (years) | 62.2 ± 13.6 | 62.1 ± 13.1 | 1.01 (0.82 - 1.23)* | 0.956 |
| Male gender | 38 (66.7) | 506 (61.8) | 1.24 (0.70 - 2.18) | 0.462 |
| Past history of stroke | 15 (26.3) | 132 (16.1) | 1.86 (1.00 - 3.45) | 0.046 |
| Hypertension | 48 (84.2) | 641 (78.3) | 1.48 (0.71 - 3.08) | 0.290 |
| Diabetes mellitus | 7 (12.7) | 152 (18.9) | 0.61 (0.27 - 1.38) | 0.255 |
| Current cigarette use | 13 (22.8) | 214 (26.1) | 0.84 (0.44 - 1.58) | 0.580 |
| Baseline NIHSS score | 11.5 (0, 33) | 10 (0, 40) | 1.01 (0.98 - 1.06)** | 0.409 |
| Early neurological deterioration | 5 (8.8) | 51 (6.2) | 1.45 (0.55 - 3.78) | 0.448 |
| Intensive SBP lowering treatment | 33 (57.9) | 417 (50.9) | 1.33 (0.77 - 2.28) | 0.308 |
| Mean minimum SBP in the first 2 hours (mmHg) | 135.8 ± 15.4) | 134.3 ± 16.3 | 1.06 (0.90 - 1.25)* | 0.510 |
| Baseline hematoma volume (cm3) | 17.8 (1.2, 53.1) | 9.7 (0.1, 85.2) | 1.05 (1.03 - 1.06)*** | <.0001 |
| Hematoma volume increase in 24 hours | 39 (68.4) | 393 (48) | 2.35 (1.32 - 4.17) | 0.003 |
| Baseline edema volume (cm3) | 1.9 (0.2, 14.1) | 1.4 (0, 28.3) | 1.28 (1.06 - 1.56)# | 0.007 |
| Edema volume change in 24 hours (cm3) | 2.1 ± 4.6 | 1.2 ± 3.7 | 1.05 (0.99 - 1.12)*** | 0.143 |
| Presence of intraventricular hemorrhage at baseline | 25 (43.9) | 195 (23.8) | 2.50 (1.45 - 4.32) | 0.001 |
| Lobar hemorrhage | 12 (21.1) | 84 (10.3) | 2.33 (1.19 - 4.59) | 0.012 |

**Supplemental Table I. Comparisons of pre-treatment characteristics and early outcomes between subjects with and without late neurological deterioration. Subjects missing baseline or 24-hour CT scan (n=124) were excluded.**

Values indicate means ± SD or median (minimum, maximum) for continuous variables, and number (%) for categorical variables. Odds ratio and p-values based on unadjusted logistic regression. *Odds ratio per 10-unit increase. **Odds ratio per 1-point increase. ***Odds ratio per 1-cm3 increase. #Odd ratio per 2-fold increase. ND indicates neurological deterioration; NIHSS, National Institutes of Health Stroke Scale; SBP, systolic blood pressure.

|  | Late ND | Early ND | Odds ratio (95% CI) | *P* value |
| --- | --- | --- | --- | --- |
|  | n=57 | n=75 |  |  |
| Age (years) | 63.1 ± 14.2 | 62.9 ± 14.1 | 1.01 (0.79 - 1.29)* | 0.935 |
| Male gender | 38 (66.7) | 39 (52.0) | 1.85 (0.90 - 3.77) | 0.091 |
| Past history of stroke | 18 (31.6) | 11 (14.7) | 2.69 (1.15 - 6.28) | 0.020 |
| Hypertension | 51 (89.5) | 62 (82.7) | 1.78 (0.63 - 5.02) | 0.270 |
| Diabetes mellitus | 7 (12.7) | 16 (21.3) | 0.52 (0.20 - 1.35) | 0.204 |
| Current cigarette use | 14 (24.6) | 16 (21.3) | 1.20 (0.53 - 2.72) | 0.661 |
| Baseline NIHSS score | 11.5 (0, 25) | 14.5 (3, 28) | 0.93 (0.88 - 0.99)** | 0.022 |
| Intensive SBP lowering treatment | 35 (61.4) | 46 (61.3) | 1.00 (0.49 - 2.03) | 0.994 |
| Mean minimum SBP in the first 2 hours (mmHg) | 136.1 ± 15.6 | 131.6 ± 16.0 | 1.20 (0.96 - 1.50)* | 0.110 |
| Baseline hematoma volume (cm3) | 19.3 (1.2, 53.1) | 17.6 (0.9, 85.2) | 1.00 (0.98 - 1.02)*** | 0.695 |
| Baseline edema volume (cm3) | 2 (0.2, 14.1) | 1.7 (0.3, 28.3) | 0.97 (0.78 - 1.21)# | 0.730 |
| Presence of intraventricular hemorrhage at baseline | 22 (39.3) | 29 (39.2) | 1.00 (0.49 - 2.04) | 0.991 |
| Lobar hemorrhage | 12 (21.4) | 9 (12.2) | 1.97 (0.77 - 5.07) | 0.155 |

**Supplemental Table II: Comparisons of pre-treatment characteristics and early outcomes between subjects with early and late neurological deterioration. Subjects with both early and late neurological deterioration (n=7) were excluded.**

Values indicate means ± SD or median (minimum, maximum) for continuous variables, and number (%) for categorical variables. Odds ratio and p-values based on unadjusted logistic regression. *Odds ratio per 10-unit increase. **Odds ratio per 1-point increase. ***Odds ratio per 1-cm3 increase. #Odd ratio per 2-fold increase. ND indicates neurological deterioration; NIHSS, National Institutes of Health Stroke Scale; SBP, systolic blood pressure.
